# Supplementary material for: Characterization of the fecal and mucosa-associated microbiota in dogs with colorectal epithelial tumors
Source: PubMed Central journal article supplement (PMC5979030; doi:10.1371/journal.pone.0198342), 2018-05-31

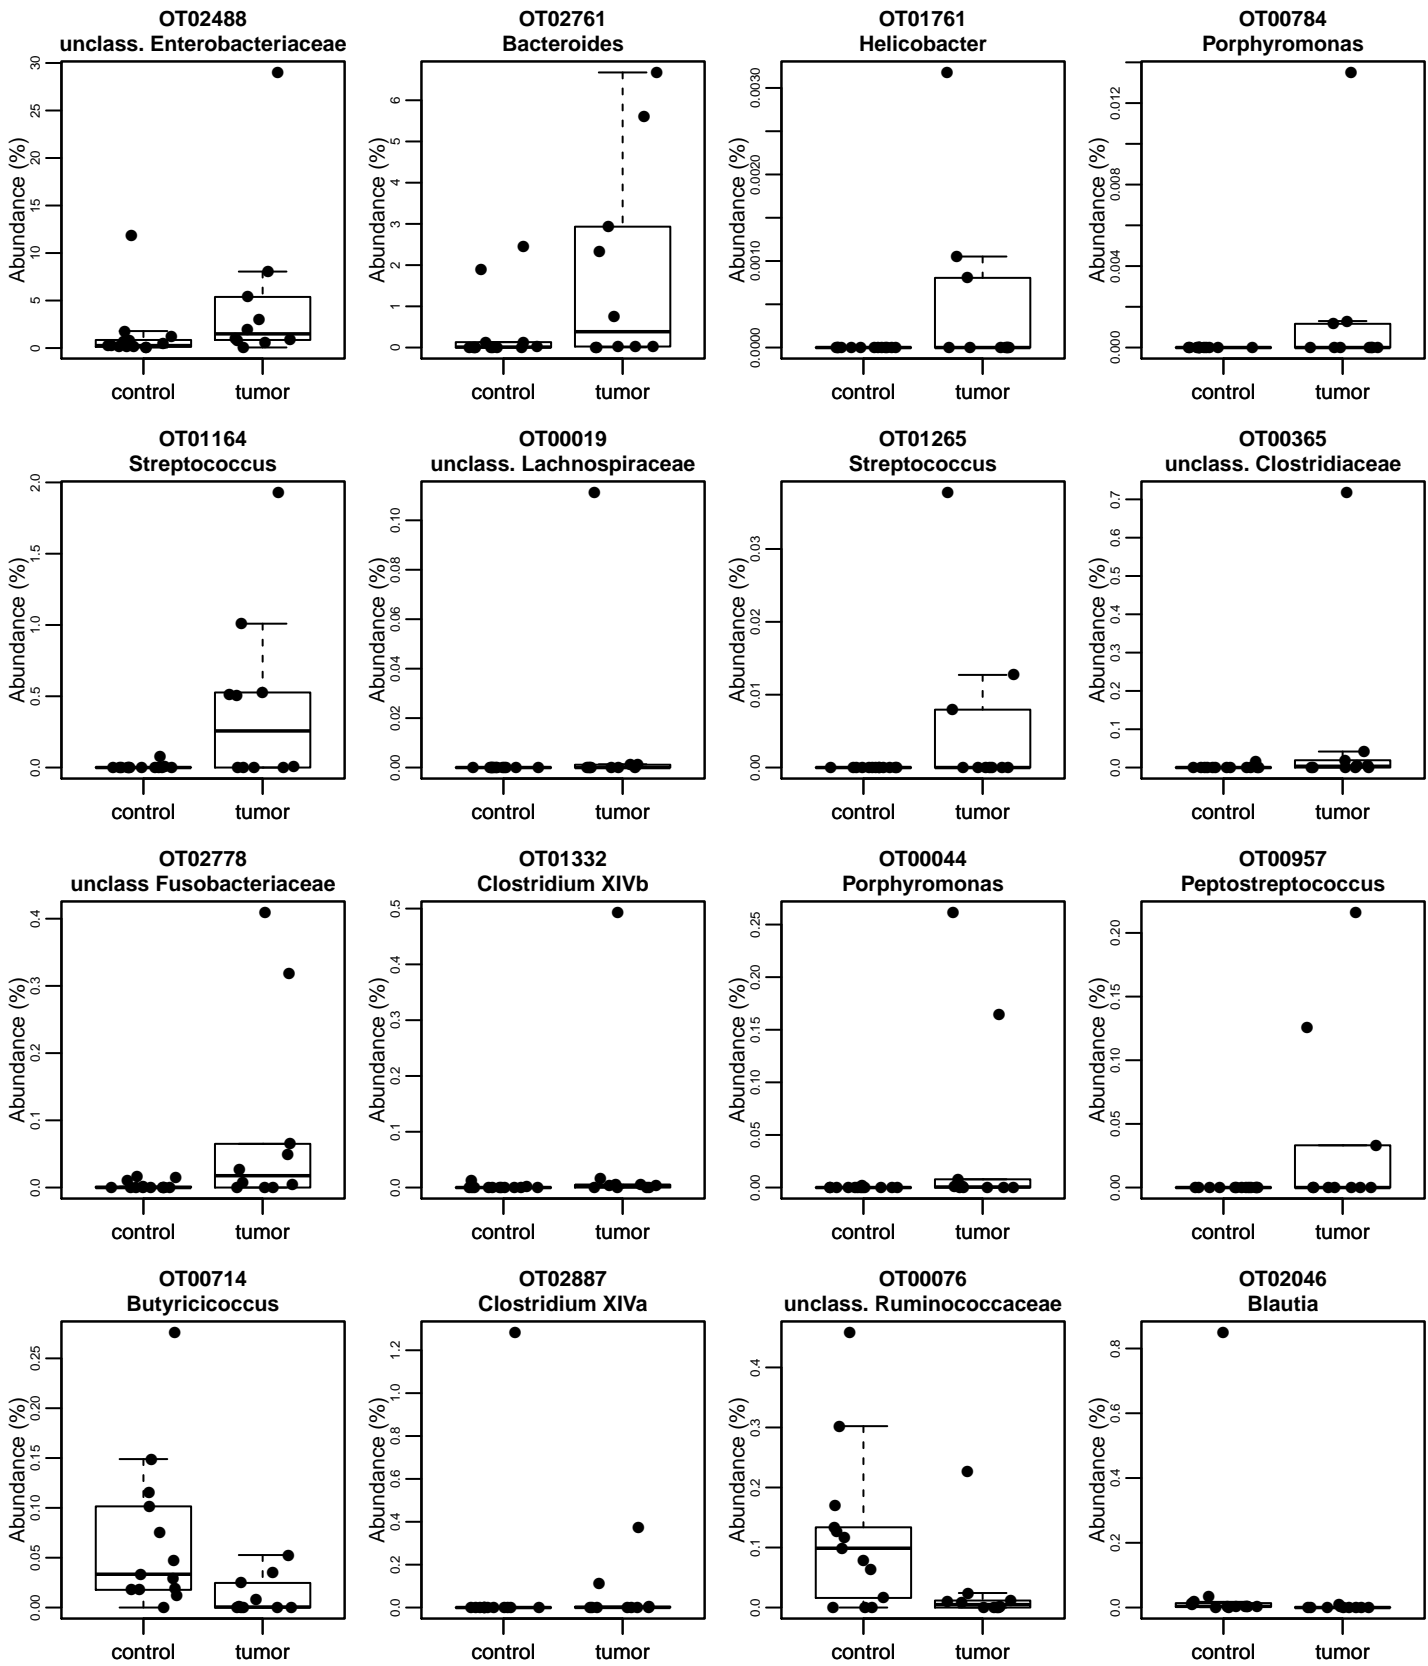

Supplement: pone.0198342.s005.pdf [file pone.0198342.s005.pdf]
